# Supplementary material for: DNA Barcoding for Species Identification of Moss-Dwelling Invertebrates: Performance of Nanopore Sequencing and Coverage in Reference Database
Source: MDPI journal article supplement (doi:10.3390/d16040196), 2024-03-25
Supplement: s1 [file s1]

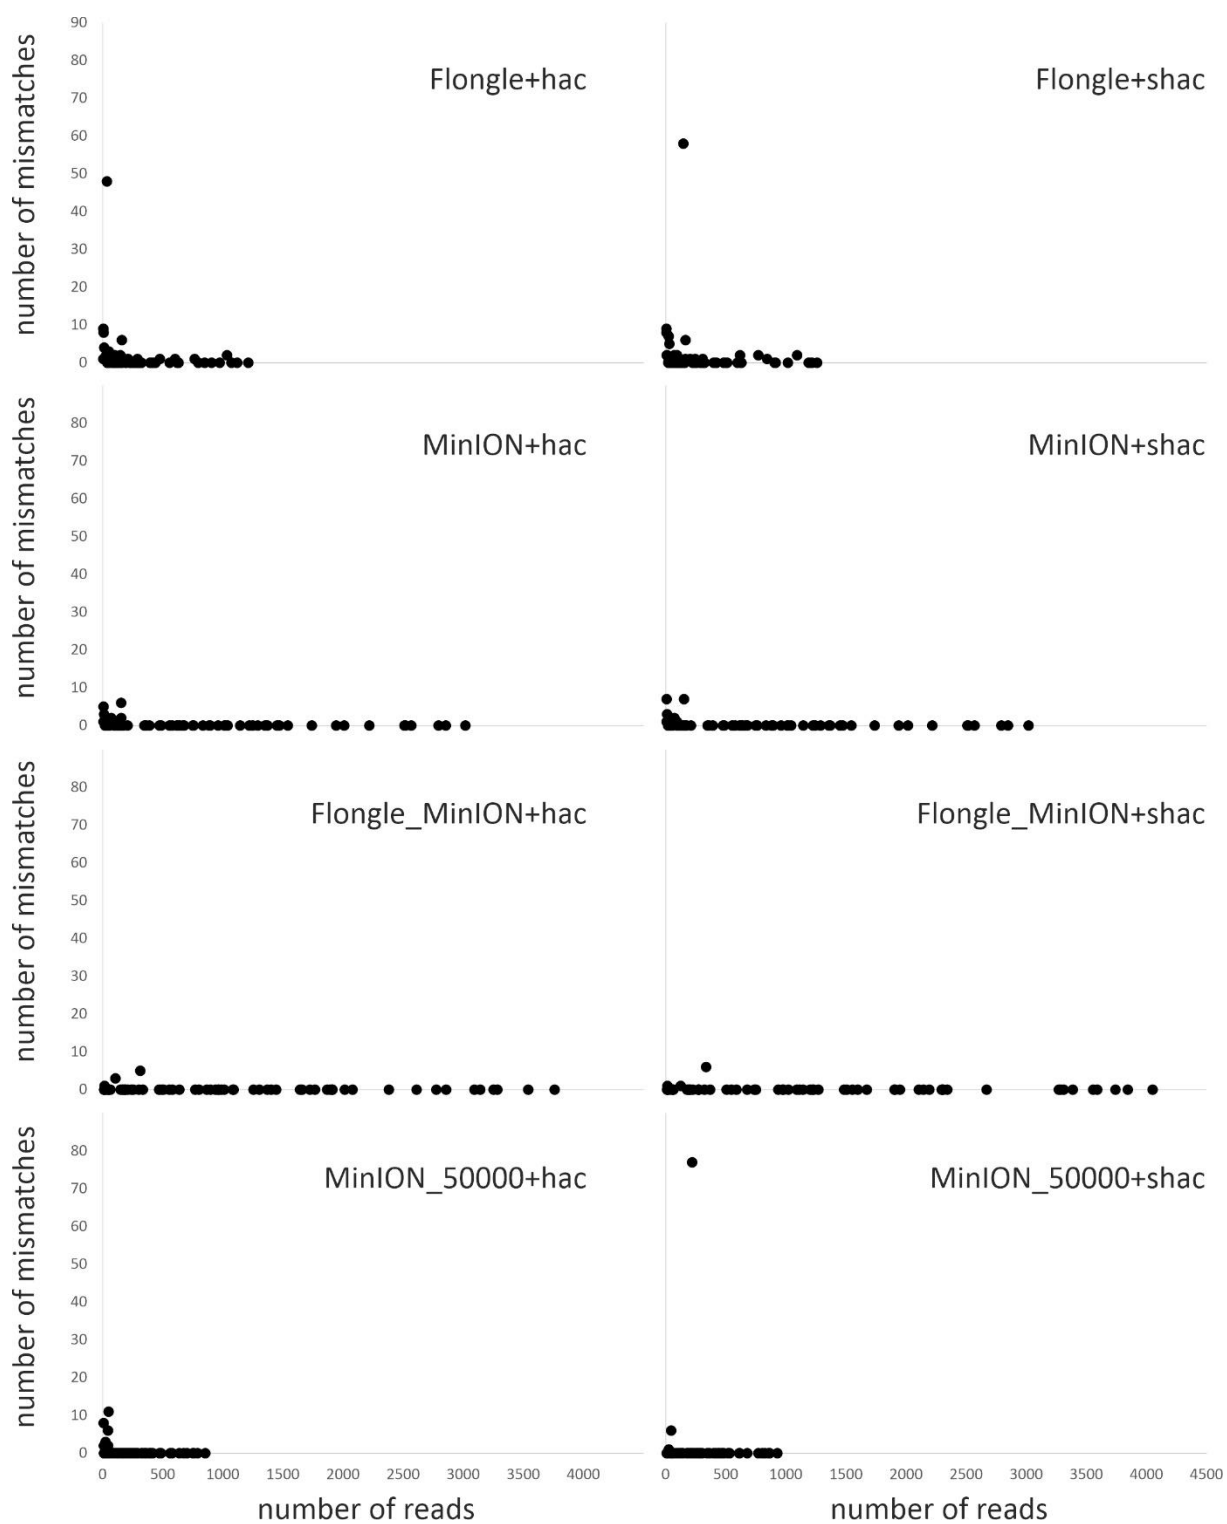

**Figure S2.** Relationship between number of mismatches (= potentially erroneous bases) and number of reads per sample, depending on nanopore sequencing approach (Flongle, MinION, Flongle+MinION combined, MinION downsampled to 50000 total reads) and basecalling algorithm (hac, high accuracy & shac, super high accuracy).
