# Supplementary material for: DNA Barcoding for Species Identification of Moss-Dwelling Invertebrates: Performance of Nanopore Sequencing and Coverage in Reference Database
Source: MDPI journal article supplement (doi:10.3390/d16040196), 2024-03-25
Supplement: s1 [file s1]

**Table S2.** Taxonomic assignment of shac basecalled Flongle and MinION barcodes, and barcodes generated via Sanger sequencing of those samples for which barcodes could be generated. If no species match was found on BOLD, assignment to higher taxonomic levels was done both on BOLD (incl. tree-based assignment) and GenBank.

| Query ID <sup>1</sup> | BOLD                               |                                  | GenBank assignment<br>based on best match (% similarity) <sup>3</sup> |
|-----------------------|------------------------------------|----------------------------------|-----------------------------------------------------------------------|
|                       | Best ID <sup>2,3</sup>             | % similarity within the same BIN |                                                                       |
| 1f ambs=0 estgaps=0   | <i>Myrmica scabrinodis</i>         | 100                              | <i>aloba, spinosior, sabuleti</i>                                     |
| 1m ambs=0 estgaps=0   | <i>Myrmica scabrinodis</i>         | 100                              |                                                                       |
| 1s ambs=7             | <i>Myrmica scabrinodis</i>         | 100                              |                                                                       |
| 2f ambs=0 estgaps=0   | <i>Myrmica scabrinodis</i>         | 100                              |                                                                       |
| 2m ambs=0 estgaps=0   | <i>Myrmica scabrinodis</i>         | 100                              |                                                                       |
| 2s ambs=16            | <i>Myrmica scabrinodis</i>         | 100                              |                                                                       |
| 3f ambs=1 estgaps=1   | <i>Pogonognathellus flavescens</i> | 100                              |                                                                       |
| 3m ambs=0 estgaps=0   | <i>Pogonognathellus flavescens</i> | 100                              |                                                                       |
| 3s ambs=3             | <i>Pogonognathellus flavescens</i> | 100                              |                                                                       |
| 4f ambs=0 estgaps=0   | <i>Pseudisotoma sensibilis</i>     | 99.69                            | Tomoceridae 93.42                                                     |
| 4m ambs=0 estgaps=0   | Tomoceridae                        | 93.43                            |                                                                       |
| 5f ambs=0 estgaps=0   | <i>Minyriolus pusillus</i>         | 100                              |                                                                       |
| 5m ambs=0 estgaps=0   | <i>Minyriolus pusillus</i>         | 100                              |                                                                       |
| 5s ambs=1             | <i>Minyriolus pusillus</i>         | 100                              |                                                                       |
| 6f ambs=0 estgaps=0   | <i>Pseudisotoma sensibilis</i>     | 99.69                            |                                                                       |
| 6m ambs=0 estgaps=0   | <i>Pseudisotoma sensibilis</i>     | 99.54                            | Tomoceridae 93.42                                                     |
| 6s ambs=9             | <i>Pseudisotoma sensibilis</i>     | 99.08                            |                                                                       |
| 7m ambs=0 estgaps=0   | Tomoceridae                        | 93.43                            |                                                                       |
| 7s ambs=0             | Tomoceridae                        | 93.43                            | Tomoceridae 93.42                                                     |
| 8f ambs=3 estgaps=1   | <i>Gongylidiellum latebricola</i>  | 100                              |                                                                       |
| 8m ambs=0 estgaps=0   | <i>Gongylidiellum latebricola</i>  | 100                              |                                                                       |
| 8s ambs=1             | <i>Gongylidiellum latebricola</i>  | 100                              |                                                                       |
| 9f ambs=0 estgaps=0   | <i>Lasius platythorax/niger</i>    | 100                              | <i>psammophilus</i>                                                   |
| 9m ambs=0 estgaps=0   | <i>Lasius platythorax/niger</i>    | 100                              | <i>psammophilus</i>                                                   |
| 9s ambs=0             | <i>Lasius platythorax/niger</i>    | 100                              | <i>psammophilus</i>                                                   |

|                      |                                    |       |                                                        |                   |
|----------------------|------------------------------------|-------|--------------------------------------------------------|-------------------|
| 10m ambs=0 estgaps=0 | <i>Lithobius tenebrosus</i>        | 99.84 | <i>nodulipes</i>                                       |                   |
| 10s ambs=3           | <i>Lithobius tenebrosus</i>        | 99.69 | <i>nodulipes</i>                                       |                   |
| 11s ambs=0           | Parasitidae                        | 83.72 |                                                        | Parasitidae 83.77 |
| 12s ambs=0           | <i>Rhacognathus punctatus</i>      | 99.84 |                                                        |                   |
| 13s ambs=0           | <i>Minyriolus pusillus</i>         | 100   |                                                        |                   |
| 15f ambs=2 estgaps=2 | <i>Pogonognathellus flavescens</i> | 100   |                                                        |                   |
| 15m ambs=0 estgaps=0 | <i>Pogonognathellus flavescens</i> | 100   |                                                        |                   |
| 15s ambs=0           | <i>Pogonognathellus flavescens</i> | 100   |                                                        |                   |
| 16f ambs=0 estgaps=0 | <i>Neon reticulatus</i>            | 100   |                                                        |                   |
| 16m ambs=0 estgaps=0 | <i>Neon reticulatus</i>            | 100   |                                                        |                   |
| 16s ambs=0           | <i>Neon reticulatus</i>            | 100   |                                                        |                   |
| 18s ambs=0           | <i>Lithobius agilis</i>            | 100   | <i>pelidnus</i>                                        |                   |
| 20f ambs=0 estgaps=0 | <i>Tetramorium impurum</i>         | 99.68 |                                                        |                   |
| 20m ambs=0 estgaps=0 | <i>Tetramorium impurum</i>         | 100   |                                                        |                   |
| 20s ambs=2           | <i>Tetramorium impurum</i>         | 100   |                                                        |                   |
| 21f ambs=0 estgaps=0 | <i>Otiorhynchus gemmatus</i>       | 99.69 |                                                        |                   |
| 21m ambs=0 estgaps=0 | <i>Otiorhynchus gemmatus</i>       | 100   |                                                        |                   |
| 21s ambs=0           | <i>Otiorhynchus gemmatus</i>       | 100   |                                                        |                   |
| 22f ambs=0 estgaps=0 | <i>Rhacognathus punctatus</i>      | 99.85 |                                                        |                   |
| 22m ambs=0 estgaps=0 | <i>Rhacognathus punctatus</i>      | 99.85 |                                                        |                   |
| 22s ambs=0           | <i>Rhacognathus punctatus</i>      | 99.85 |                                                        |                   |
| 24f ambs=0 estgaps=0 | <i>Lithobius agilis</i>            | 100   | <i>pelidnus</i>                                        |                   |
| 24m ambs=0 estgaps=0 | <i>Lithobius agilis</i>            | 100   | <i>pelidnus</i>                                        |                   |
| 24s ambs=0           | <i>Lithobius agilis</i>            | 99.84 | <i>pelidnus</i>                                        |                   |
| 26f ambs=2 estgaps=7 | Arthropoda <sup>4</sup>            | 84.13 |                                                        |                   |
| 26m ambs=1 estgaps=6 | Arthropoda <sup>4</sup>            | 84.13 |                                                        |                   |
| 28f ambs=0 estgaps=0 | <i>Platynocheilus peltifer</i>     | 99.85 |                                                        |                   |
| 28m ambs=0 estgaps=0 | <i>Platynocheilus peltifer</i>     | 99.85 |                                                        |                   |
| 28s ambs=0           | <i>Platynocheilus peltifer</i>     | 99.85 |                                                        |                   |
| 30f ambs=0 estgaps=0 | <i>Pemphigus populivenae</i>       | 99.69 | <i>groenlandicus, monophagus, populiglobuli, sp. D</i> |                   |
| 30m ambs=0 estgaps=0 | <i>Pemphigus populivenae</i>       | 99.69 | <i>groenlandicus, monophagus, populiglobuli, sp. D</i> |                   |

|                      |                                    |       |                                                        |
|----------------------|------------------------------------|-------|--------------------------------------------------------|
| 30s ambs=0           | <i>Pemphigus populivenae</i>       | 99.69 | <i>groenlandicus, monophagus, populiglobuli, sp. D</i> |
| 31s ambs=2           | Entomobryidae                      | 100   | Entomobryidae 84.99                                    |
| 32f ambs=2 estgaps=2 | <i>Pogonognathellus flavescens</i> | 100   |                                                        |
| 32m ambs=0 estgaps=0 | <i>Pogonognathellus flavescens</i> | 100   |                                                        |
| 32s ambs=1           | <i>Pogonognathellus flavescens</i> | 99.84 |                                                        |
| 33f ambs=0 estgaps=0 | <i>Ceratocombus coleoptratus</i>   | 100   |                                                        |
| 33m ambs=0 estgaps=0 | <i>Ceratocombus coleoptratus</i>   | 100   |                                                        |
| 33s ambs=0           | <i>Ceratocombus coleoptratus</i>   | 100   |                                                        |
| 34f ambs=2 estgaps=2 | Harpactea lepida                   | 100   |                                                        |
| 34m ambs=0 estgaps=0 | Harpactea lepida                   | 100   |                                                        |
| 35f ambs=1 estgaps=1 | <i>Pogonognathellus flavescens</i> | 99.69 |                                                        |
| 35m ambs=0 estgaps=0 | <i>Pogonognathellus flavescens</i> | 99.69 |                                                        |
| 35s ambs=3           | <i>Pogonognathellus flavescens</i> | 99.84 |                                                        |
| 36f ambs=2 estgaps=2 | <i>Nothrus silvestris</i>          | 99.69 |                                                        |
| 36m ambs=0 estgaps=0 | <i>Nothrus silvestris</i>          | 99.69 |                                                        |
| 36s ambs=2           | <i>Nothrus silvestris</i>          | 99.69 |                                                        |
| 37s ambs=0           | Tomoceridae                        | 87.44 | Tomoceridae 87.58                                      |
| 38f ambs=0 estgaps=0 | Entomobryidae                      | 100   | Entomobryidae 85.15                                    |
| 38m ambs=0 estgaps=0 | Entomobryidae                      | 100   | Entomobryidae 85.15                                    |
| 38s ambs=1           | Entomobryidae                      | 100   | Entomobryidae 85.15                                    |
| 39f ambs=0 estgaps=0 | Entomobryidae                      | 100   | Entomobryidae 85.15                                    |
| 39m ambs=0 estgaps=0 | Entomobryidae                      | 100   | Entomobryidae 85.15                                    |
| 39s ambs=2           | Entomobryidae                      | 100   | Entomobryidae 85.15                                    |
| 40f ambs=0 estgaps=0 | <i>Lasius platythorax/niger</i>    | 100   | <i>psammophilus</i>                                    |
| 40m ambs=0 estgaps=0 | <i>Lasius platythorax/niger</i>    | 100   | <i>psammophilus</i>                                    |
| 40s ambs=0           | <i>Lasius platythorax/niger</i>    | 99.84 | <i>psammophilus</i>                                    |
| 41f ambs=0 estgaps=0 | Campodeidae                        | 86.32 | Campodeidae 84.49                                      |
| 41m ambs=0 estgaps=0 | Campodeidae                        | 86.32 | Campodeidae 84.49                                      |
| 41s ambs=0           | Campodeidae                        | 86.32 | Campodeidae 84.49                                      |
| 42f ambs=0 estgaps=0 | Tomoceridae                        | 93.43 | Tomoceridae 93.42                                      |
| 42m ambs=0 estgaps=0 | Tomoceridae                        | 93.43 | Tomoceridae 93.42                                      |

|                      |                                    |       |                      |
|----------------------|------------------------------------|-------|----------------------|
| 42s ambs=0           | Tomoceridae                        | 93.43 | Tomoceridae 93.42    |
| 43s ambs=0           | Tomoceridae                        | 87.44 | Tomoceridae 87.58    |
| 45f ambs=0 estgaps=0 | <i>Sintula corniger</i>            | 99.69 |                      |
| 45m ambs=0 estgaps=0 | <i>Sintula corniger</i>            | 99.69 |                      |
| 46f ambs=0 estgaps=0 | <i>Sintula corniger</i>            | 99.53 |                      |
| 46m ambs=0 estgaps=0 | <i>Sintula corniger</i>            | 99.69 |                      |
| 47m ambs=0 estgaps=0 | <i>Tapinocyba pallens</i>          | 99.69 |                      |
| 47s ambs=2           | <i>Tapinocyba pallens</i>          | 100   |                      |
| 48f ambs=0 estgaps=0 | <i>Tapinocyba pallens</i>          | 99.07 |                      |
| 48m ambs=0 estgaps=0 | <i>Tapinocyba pallens</i>          | 99.07 |                      |
| 48s ambs=0           | <i>Tapinocyba pallens</i>          | 99.38 |                      |
| 49s ambs=3           | <i>Pogonognathellus flavescens</i> | 99.68 |                      |
| 50s ambs=0           | <i>Hebrus ruficeps</i>             | 100   |                      |
| 51f ambs=3 estgaps=1 | <i>Tipula melanoceros</i>          | 98.92 |                      |
| 51m ambs=0 estgaps=0 | <i>Tipula melanoceros</i>          | 98.92 |                      |
| 51s ambs=0           | <i>Tipula melanoceros</i>          | 98.92 |                      |
| 52f ambs=1 estgaps=1 | <i>Hebrus ruficeps</i>             | 100   |                      |
| 52m ambs=0 estgaps=0 | <i>Hebrus ruficeps</i>             | 100   |                      |
| 52s ambs=0           | <i>Hebrus ruficeps</i>             | 100   |                      |
| 53f ambs=1 estgaps=1 | <i>Hebrus ruficeps</i>             | 100   |                      |
| 53m ambs=0 estgaps=0 | <i>Hebrus ruficeps</i>             | 100   |                      |
| 53s ambs=1           | <i>Hebrus ruficeps</i>             | 100   |                      |
| 54f ambs=0 estgaps=0 | Sarcoptiformes                     | 80.12 | Sarcoptiformes 80.18 |
| 54m ambs=0 estgaps=0 | Sarcoptiformes                     | 80.12 | Sarcoptiformes 80.18 |
| 54s ambs=3           | Sarcoptiformes                     | 79.96 | Sarcoptiformes 80.03 |
| 55f ambs=0 estgaps=0 | Sarcoptiformes                     | 80.12 | Sarcoptiformes 80.18 |
| 55m ambs=0 estgaps=0 | Sarcoptiformes                     | 80.12 | Sarcoptiformes 80.18 |
| 56f ambs=1 estgaps=1 | <i>Hebrus ruficeps</i>             | 100   |                      |
| 56m ambs=0 estgaps=0 | <i>Hebrus ruficeps</i>             | 100   |                      |
| 56s ambs=0           | <i>Hebrus ruficeps</i>             | 100   |                      |
| 57m ambs=0 estgaps=0 | <i>Hebrus ruficeps</i>             | 100   |                      |

|                      |                                  |       |                                        |
|----------------------|----------------------------------|-------|----------------------------------------|
| 57s ambs=0           | <i>Hebrus ruficeps</i>           | 100   |                                        |
| 58f ambs=0 estgaps=0 | <i>Piratula latitans</i>         | 100   |                                        |
| 58m ambs=0 estgaps=0 | <i>Piratula latitans</i>         | 100   |                                        |
| 58s ambs=0           | <i>Piratula latitans</i>         | 100   |                                        |
| 59s ambs=0           | <i>Pselaphus heisei</i>          | 100   |                                        |
| 60f ambs=2 estgaps=2 | <i>Hebrus ruficeps</i>           | 100   |                                        |
| 60m ambs=0 estgaps=0 | <i>Hebrus ruficeps</i>           | 100   |                                        |
| 60s ambs=9           | <i>Hebrus ruficeps</i>           | 100   |                                        |
| 61f ambs=1 estgaps=1 | <i>Hebrus ruficeps</i>           | 100   |                                        |
| 61m ambs=0 estgaps=0 | <i>Hebrus ruficeps</i>           | 100   |                                        |
| 61s ambs=1           | <i>Hebrus ruficeps</i>           | 100   |                                        |
| 62f ambs=0 estgaps=0 | <i>Ceratocombus coleoptratus</i> | 99.85 |                                        |
| 62m ambs=0 estgaps=0 | <i>Ceratocombus coleoptratus</i> | 99.85 |                                        |
| 62s ambs=1           | <i>Ceratocombus coleoptratus</i> | 99.85 |                                        |
| 63f ambs=0 estgaps=0 | Tomoceridae                      | 86.57 | Tomoceridae 85.76                      |
| 63m ambs=0 estgaps=0 | Tomoceridae                      | 86.57 | Tomoceridae 85.76                      |
| 63s ambs=1           | Tomoceridae                      | 86.57 | Tomoceridae 85.76                      |
| 65f ambs=0 estgaps=0 | Tomoceridae                      | 98.47 | Entomobryidae 83.46, Tomoceridae 83.31 |
| 65m ambs=0 estgaps=0 | Tomoceridae                      | 98.47 | Entomobryidae 83.46, Tomoceridae 83.31 |
| 65s ambs=1           | Tomoceridae                      | 98.45 | Entomobryidae 83.46, Tomoceridae 83.31 |
| 66s ambs=6           | <i>Arctosa lutetiana</i>         | 99.84 |                                        |
| 67f ambs=0 estgaps=0 | Campodeidae                      | 86.24 | Campodeidae 84.49                      |
| 67m ambs=0 estgaps=0 | Campodeidae                      | 86.24 | Campodeidae 84.49                      |
| 67s ambs=0           | Campodeidae                      | 86.24 | Campodeidae 84.49                      |
| 68f ambs=0 estgaps=0 | Tomoceridae                      | 98.47 | Entomobryidae 83.46, Tomoceridae 83.31 |
| 68m ambs=0 estgaps=0 | Tomoceridae                      | 98.47 | Entomobryidae 83.46, Tomoceridae 83.31 |
| 68s ambs=3           | Tomoceridae                      | 98.45 | Entomobryidae 83.46, Tomoceridae 83.31 |
| 71f ambs=0 estgaps=0 | Tomoceridae                      | 93.43 | Tomoceridae 93.42                      |
| 71m ambs=0 estgaps=0 | Tomoceridae                      | 93.43 | Tomoceridae 93.42                      |
| 71s ambs=2           | Tomoceridae                      | 93.19 | Tomoceridae 93.42                      |
| 72f ambs=4 estgaps=5 | Rhagidiidae                      | 99.83 | Rhagidiidae 99.45                      |

|                      |                             |       |                  |                     |
|----------------------|-----------------------------|-------|------------------|---------------------|
| 72m ambs=0 estgaps=0 | Rhagidiidae                 | 99.63 |                  | Rhagidiidae 99.63   |
| 74f ambs=0 estgaps=0 | Tomoceridae                 | 87.56 |                  | Tomoceridae 87.58   |
| 74m ambs=0 estgaps=0 | Tomoceridae                 | 87.56 |                  | Tomoceridae 87.58   |
| 74s ambs=1           | Tomoceridae                 | 87.56 |                  | Tomoceridae 87.58   |
| 75s ambs=1           | <i>Lithobius tenebrosus</i> | 100   | <i>nodulipes</i> |                     |
| 76f ambs=5 estgaps=2 | Parasitidae                 | 86.59 |                  | Parasitidae 86.68   |
| 76m ambs=0 estgaps=0 | Parasitidae                 | 86.59 |                  | Parasitidae 86.68   |
| 76s ambs=2           | Parasitidae                 | 86.53 |                  | Parasitidae 86.68   |
| 77f ambs=0 estgaps=0 | Tomoceridae                 | 93.43 |                  | Tomoceridae 93.42   |
| 77m ambs=0 estgaps=0 | Tomoceridae                 | 93.43 |                  | Tomoceridae 93.42   |
| 77s ambs=1           | Tomoceridae                 | 93.51 |                  | Tomoceridae 93.42   |
| 81f ambs=0 estgaps=0 | <i>Lithobius agilis</i>     | 100   | <i>pelidnus</i>  |                     |
| 81m ambs=0 estgaps=0 | <i>Lithobius agilis</i>     | 100   | <i>pelidnus</i>  |                     |
| 81s ambs=0           | <i>Lithobius agilis</i>     | 100   | <i>pelidnus</i>  |                     |
| 82f ambs=0 estgaps=0 | <i>Robertus lividus</i>     | 97.32 |                  |                     |
| 82m ambs=0 estgaps=0 | <i>Robertus lividus</i>     | 97.32 |                  |                     |
| 82s ambs=0           | <i>Robertus lividus</i>     | 97.32 |                  |                     |
| 83f ambs=0 estgaps=0 | Mesostigmata                | 84.02 |                  | Parasitidae 83.77   |
| 83m ambs=0 estgaps=0 | Mesostigmata                | 84.02 |                  | Parasitidae 83.77   |
| 83s ambs=0           | Mesostigmata                | 84.02 |                  | Parasitidae 83.77   |
| 84f ambs=0 estgaps=0 | <i>Lithobius tenebrosus</i> | 100   | <i>nodulipes</i> |                     |
| 84m ambs=0 estgaps=0 | <i>Lithobius tenebrosus</i> | 100   | <i>nodulipes</i> |                     |
| 84s ambs=0           | <i>Lithobius tenebrosus</i> | 100   | <i>nodulipes</i> |                     |
| 85f ambs=1 estgaps=1 | Achipteriidae               | 88.46 |                  | Achipteriidae 83.96 |
| 85m ambs=0 estgaps=0 | Achipteriidae               | 88.63 |                  | Achipteriidae 83.96 |
| 85s ambs=9           | Achipteriidae               | 88.63 |                  | Achipteriidae 83.96 |
| 86f ambs=0 estgaps=0 | Tomoceridae                 | 87.56 |                  | Tomoceridae 87.58   |
| 86m ambs=0 estgaps=0 | Tomoceridae                 | 87.56 |                  | Tomoceridae 87.58   |
| 86s ambs=1           | Tomoceridae                 | 87.56 |                  | Tomoceridae 87.58   |

<sup>1</sup>Query ID starts with sample ID (1-86), followed by sequencing approach (f = FLongle, m = MinION, s = Sanger), the number of ambiguities (ambs) and, for the nanopore sequencing approaches, also the number of potential errors (estgaps).

<sup>2</sup>The best ID not necessarily solely based on the best match, but might include tree-based assignment and considering distribution and habitat preferences of the species sharing a haplotype or BIN (see discussion for specific cases).

<sup>3</sup>The listed best match, when no species-level identification is possible, is very conservative. We do not necessarily list the closest match on BOLD or GenBank, but the taxonomic level the sample can unambiguously (at least in our opinion, based on similarities to other barcodes on BOLD or GenBank) be assigned to.

<sup>4</sup>The assignment of sample 26 to Arthropoda is highly questionable and likely the result of erroneous data on BOLD
