# Supplementary material for: DNA Barcoding for Species Identification of Moss-Dwelling Invertebrates: Performance of Nanopore Sequencing and Coverage in Reference Database
Source: MDPI journal article supplement (doi:10.3390/d16040196), 2024-03-25
Supplement: s1 [file s1]

**Table S1.** Index sequences and PCR primers used for each individual sample. This is also the information required for demultiplexing the the basecalled reads.

| sample ID | forward index sequence | reverse index sequence | forward primer (LCO1490)  | reverse primer (HCO2198)   |
|-----------|------------------------|------------------------|---------------------------|----------------------------|
| 1         | ATCCGGTCGGAGA          | ATCCGGTCGGAGA          | GGTCAACAAATCATAAAGATATTGG | TAAACTTCAGGGTGACCAAAAAATCA |
| 2         | CTGAGGTGATCAG          | CTGAGGTGATCAG          | GGTCAACAAATCATAAAGATATTGG | TAAACTTCAGGGTGACCAAAAAATCA |
| 3         | AGTGTCTGCTAG           | AGTGTCTGCTAG           | GGTCAACAAATCATAAAGATATTGG | TAAACTTCAGGGTGACCAAAAAATCA |
| 4         | ATAAGCAATTCGA          | ATAAGCAATTCGA          | GGTCAACAAATCATAAAGATATTGG | TAAACTTCAGGGTGACCAAAAAATCA |
| 5         | ATCTAACAGGACC          | ATCTAACAGGACC          | GGTCAACAAATCATAAAGATATTGG | TAAACTTCAGGGTGACCAAAAAATCA |
| 6         | CATTATATAGCCA          | CATTATATAGCCA          | GGTCAACAAATCATAAAGATATTGG | TAAACTTCAGGGTGACCAAAAAATCA |
| 7         | CCTGATTACGTAA          | CCTGATTACGTAA          | GGTCAACAAATCATAAAGATATTGG | TAAACTTCAGGGTGACCAAAAAATCA |
| 8         | CTAATACACACCG          | CTAATACACACCG          | GGTCAACAAATCATAAAGATATTGG | TAAACTTCAGGGTGACCAAAAAATCA |
| 9         | TTATGACCGTTGC          | TTATGACCGTTGC          | GGTCAACAAATCATAAAGATATTGG | TAAACTTCAGGGTGACCAAAAAATCA |
| 10        | TTCTCGGCCGCAT          | TTCTCGGCCGCAT          | GGTCAACAAATCATAAAGATATTGG | TAAACTTCAGGGTGACCAAAAAATCA |
| 11        | TTGGCGGTAAGAA          | TTGGCGGTAAGAA          | GGTCAACAAATCATAAAGATATTGG | TAAACTTCAGGGTGACCAAAAAATCA |
| 12        | ACTTGTGCACCTG          | ACTTGTGCACCTG          | GGTCAACAAATCATAAAGATATTGG | TAAACTTCAGGGTGACCAAAAAATCA |
| 13        | CATGCCTTGATAC          | CATGCCTTGATAC          | GGTCAACAAATCATAAAGATATTGG | TAAACTTCAGGGTGACCAAAAAATCA |
| 14        | CTGACGTTCCGTA          | CTGACGTTCCGTA          | GGTCAACAAATCATAAAGATATTGG | TAAACTTCAGGGTGACCAAAAAATCA |
| 15        | GAGGAGAGACACA          | GAGGAGAGACACA          | GGTCAACAAATCATAAAGATATTGG | TAAACTTCAGGGTGACCAAAAAATCA |
| 16        | GCCGGTCCAAGTG          | GCCGGTCCAAGTG          | GGTCAACAAATCATAAAGATATTGG | TAAACTTCAGGGTGACCAAAAAATCA |
| 17        | TTGCGTCTCACGC          | TTGCGTCTCACGC          | GGTCAACAAATCATAAAGATATTGG | TAAACTTCAGGGTGACCAAAAAATCA |
| 18        | TTATTCGCACACT          | TTATTCGCACACT          | GGTCAACAAATCATAAAGATATTGG | TAAACTTCAGGGTGACCAAAAAATCA |
| 19        | TGCACAGGCGGCA          | TGCACAGGCGGCA          | GGTCAACAAATCATAAAGATATTGG | TAAACTTCAGGGTGACCAAAAAATCA |
| 20        | AACATGTGGTAAG          | AACATGTGGTAAG          | GGTCAACAAATCATAAAGATATTGG | TAAACTTCAGGGTGACCAAAAAATCA |
| 21        | ACGCGCTCTTATA          | ACGCGCTCTTATA          | GGTCAACAAATCATAAAGATATTGG | TAAACTTCAGGGTGACCAAAAAATCA |
| 22        | CAATGTTAATGGT          | CAATGTTAATGGT          | GGTCAACAAATCATAAAGATATTGG | TAAACTTCAGGGTGACCAAAAAATCA |
| 23        | CTAGGATATAGTT          | CTAGGATATAGTT          | GGTCAACAAATCATAAAGATATTGG | TAAACTTCAGGGTGACCAAAAAATCA |
| 24        | CTGTAGGCGAGGA          | CTGTAGGCGAGGA          | GGTCAACAAATCATAAAGATATTGG | TAAACTTCAGGGTGACCAAAAAATCA |
| 25        | CTGTCGAGGCGAC          | CTGTCGAGGCGAC          | GGTCAACAAATCATAAAGATATTGG | TAAACTTCAGGGTGACCAAAAAATCA |
| 26        | GACTAATGAGGAA          | GACTAATGAGGAA          | GGTCAACAAATCATAAAGATATTGG | TAAACTTCAGGGTGACCAAAAAATCA |
| 27        | TATCCGTAATCAT          | TATCCGTAATCAT          | GGTCAACAAATCATAAAGATATTGG | TAAACTTCAGGGTGACCAAAAAATCA |
| 28        | TCCTGGAGGATAA          | TCCTGGAGGATAA          | GGTCAACAAATCATAAAGATATTGG | TAAACTTCAGGGTGACCAAAAAATCA |
| 29        | TCTACTGTTGTGC          | TCTACTGTTGTGC          | GGTCAACAAATCATAAAGATATTGG | TAAACTTCAGGGTGACCAAAAAATCA |
| 30        | TGTATATTCAGCG          | TGTATATTCAGCG          | GGTCAACAAATCATAAAGATATTGG | TAAACTTCAGGGTGACCAAAAAATCA |
| 31        | ACATCAGTAGTTC          | ACATCAGTAGTTC          | GGTCAACAAATCATAAAGATATTGG | TAAACTTCAGGGTGACCAAAAAATCA |
| 32        | AGCGCTGGACCAA          | AGCGCTGGACCAA          | GGTCAACAAATCATAAAGATATTGG | TAAACTTCAGGGTGACCAAAAAATCA |
| 33        | CAAGATCGGTACC          | CAAGATCGGTACC          | GGTCAACAAATCATAAAGATATTGG | TAAACTTCAGGGTGACCAAAAAATCA |
| 34        | CCAGCCTGACGGT          | CCAGCCTGACGGT          | GGTCAACAAATCATAAAGATATTGG | TAAACTTCAGGGTGACCAAAAAATCA |
| 35        | CCGAAGCCGGTTC          | CCGAAGCCGGTTC          | GGTCAACAAATCATAAAGATATTGG | TAAACTTCAGGGTGACCAAAAAATCA |
| 36        | CCGAGCAGCTGTT          | CCGAGCAGCTGTT          | GGTCAACAAATCATAAAGATATTGG | TAAACTTCAGGGTGACCAAAAAATCA |
| 37        | CCTCCGCACAATC          | CCTCCGCACAATC          | GGTCAACAAATCATAAAGATATTGG | TAAACTTCAGGGTGACCAAAAAATCA |
| 38        | CTCTAACCTATTA          | CTCTAACCTATTA          | GGTCAACAAATCATAAAGATATTGG | TAAACTTCAGGGTGACCAAAAAATCA |
| 39        | GCACCTTGACATA          | GCACCTTGACATA          | GGTCAACAAATCATAAAGATATTGG | TAAACTTCAGGGTGACCAAAAAATCA |
| 40        | TAAGCGTGCTGAA          | TAAGCGTGCTGAA          | GGTCAACAAATCATAAAGATATTGG | TAAACTTCAGGGTGACCAAAAAATCA |
| 41        | TTCGGCACAGGAG          | TTCGGCACAGGAG          | GGTCAACAAATCATAAAGATATTGG | TAAACTTCAGGGTGACCAAAAAATCA |
| 42        | AGACTCGATTGAG          | AGACTCGATTGAG          | GGTCAACAAATCATAAAGATATTGG | TAAACTTCAGGGTGACCAAAAAATCA |
| 43        | ATCCTTCTGTTCT          | ATCCTTCTGTTCT          | GGTCAACAAATCATAAAGATATTGG | TAAACTTCAGGGTGACCAAAAAATCA |
| 44        | CGTTACTTAGGTC          | CGTTACTTAGGTC          | GGTCAACAAATCATAAAGATATTGG | TAAACTTCAGGGTGACCAAAAAATCA |
| 45        | CTGGTTGGCTATC          | CTGGTTGGCTATC          | GGTCAACAAATCATAAAGATATTGG | TAAACTTCAGGGTGACCAAAAAATCA |

|    |               |               |                           |                            |
|----|---------------|---------------|---------------------------|----------------------------|
| 46 | GCACCAACGATTG | GCACCAACGATTG | GGTCAACAAATCATAAAGATATTGG | TAAACTTCAGGGTGACCAAAAAATCA |
| 47 | TCTTATGCATAAC | TCTTATGCATAAC | GGTCAACAAATCATAAAGATATTGG | TAAACTTCAGGGTGACCAAAAAATCA |
| 48 | TTAGGTGTGGACC | TTAGGTGTGGACC | GGTCAACAAATCATAAAGATATTGG | TAAACTTCAGGGTGACCAAAAAATCA |
| 49 | TTCTTCTGGAACA | TTCTTCTGGAACA | GGTCAACAAATCATAAAGATATTGG | TAAACTTCAGGGTGACCAAAAAATCA |
| 50 | AGCAAGTGGCTCT | AGCAAGTGGCTCT | GGTCAACAAATCATAAAGATATTGG | TAAACTTCAGGGTGACCAAAAAATCA |
| 51 | TCAAGTCACTAAT | TCAAGTCACTAAT | GGTCAACAAATCATAAAGATATTGG | TAAACTTCAGGGTGACCAAAAAATCA |
| 52 | ATGAAGACTACTG | ATGAAGACTACTG | GGTCAACAAATCATAAAGATATTGG | TAAACTTCAGGGTGACCAAAAAATCA |
| 53 | CACCGGTAGAACC | CACCGGTAGAACC | GGTCAACAAATCATAAAGATATTGG | TAAACTTCAGGGTGACCAAAAAATCA |
| 54 | CAGAACAACGCAT | CAGAACAACGCAT | GGTCAACAAATCATAAAGATATTGG | TAAACTTCAGGGTGACCAAAAAATCA |
| 55 | CCTGCCGAGAACG | CCTGCCGAGAACG | GGTCAACAAATCATAAAGATATTGG | TAAACTTCAGGGTGACCAAAAAATCA |
| 56 | GTGATGGAGCGGT | GTGATGGAGCGGT | GGTCAACAAATCATAAAGATATTGG | TAAACTTCAGGGTGACCAAAAAATCA |
| 57 | TACGAACTATAGC | TACGAACTATAGC | GGTCAACAAATCATAAAGATATTGG | TAAACTTCAGGGTGACCAAAAAATCA |
| 58 | TACGGACCGCTCA | TACGGACCGCTCA | GGTCAACAAATCATAAAGATATTGG | TAAACTTCAGGGTGACCAAAAAATCA |
| 59 | TGGACGCTAGATC | TGGACGCTAGATC | GGTCAACAAATCATAAAGATATTGG | TAAACTTCAGGGTGACCAAAAAATCA |
| 60 | AGTCTTCACCTCC | AGTCTTCACCTCC | GGTCAACAAATCATAAAGATATTGG | TAAACTTCAGGGTGACCAAAAAATCA |
| 61 | AGTGCTTATCCGT | AGTGCTTATCCGT | GGTCAACAAATCATAAAGATATTGG | TAAACTTCAGGGTGACCAAAAAATCA |
| 62 | ATCGCTGCCTGGC | ATCGCTGCCTGGC | GGTCAACAAATCATAAAGATATTGG | TAAACTTCAGGGTGACCAAAAAATCA |
| 63 | ATGCTTGCGACAG | ATGCTTGCGACAG | GGTCAACAAATCATAAAGATATTGG | TAAACTTCAGGGTGACCAAAAAATCA |
| 64 | CAATCCTCAAGAG | CAATCCTCAAGAG | GGTCAACAAATCATAAAGATATTGG | TAAACTTCAGGGTGACCAAAAAATCA |
| 65 | CATGCACACCTCT | CATGCACACCTCT | GGTCAACAAATCATAAAGATATTGG | TAAACTTCAGGGTGACCAAAAAATCA |
| 66 | CGGAGAATATTAT | CGGAGAATATTAT | GGTCAACAAATCATAAAGATATTGG | TAAACTTCAGGGTGACCAAAAAATCA |
| 67 | GAGCGAAGGTAGT | GAGCGAAGGTAGT | GGTCAACAAATCATAAAGATATTGG | TAAACTTCAGGGTGACCAAAAAATCA |
| 68 | GGCGACTGTTCT  | GGCGACTGTTCT  | GGTCAACAAATCATAAAGATATTGG | TAAACTTCAGGGTGACCAAAAAATCA |
| 69 | GTCAGTTAACGAC | GTCAGTTAACGAC | GGTCAACAAATCATAAAGATATTGG | TAAACTTCAGGGTGACCAAAAAATCA |
| 70 | TCCACAGATACAG | TCCACAGATACAG | GGTCAACAAATCATAAAGATATTGG | TAAACTTCAGGGTGACCAAAAAATCA |
| 71 | TCGAGTTGTAAC  | TCGAGTTGTAAC  | GGTCAACAAATCATAAAGATATTGG | TAAACTTCAGGGTGACCAAAAAATCA |
| 72 | TCGGTCTTAGACG | TCGGTCTTAGACG | GGTCAACAAATCATAAAGATATTGG | TAAACTTCAGGGTGACCAAAAAATCA |
| 73 | TCTAAGGAGTTAT | TCTAAGGAGTTAT | GGTCAACAAATCATAAAGATATTGG | TAAACTTCAGGGTGACCAAAAAATCA |
| 74 | TCTATCTCTCGCT | TCTATCTCTCGCT | GGTCAACAAATCATAAAGATATTGG | TAAACTTCAGGGTGACCAAAAAATCA |
| 75 | TGTGAAGTTGCCA | TGTGAAGTTGCCA | GGTCAACAAATCATAAAGATATTGG | TAAACTTCAGGGTGACCAAAAAATCA |
| 76 | TTACCATTCCTCA | TTACCATTCCTCA | GGTCAACAAATCATAAAGATATTGG | TAAACTTCAGGGTGACCAAAAAATCA |
| 77 | AGATTCTACACAA | AGATTCTACACAA | GGTCAACAAATCATAAAGATATTGG | TAAACTTCAGGGTGACCAAAAAATCA |
| 78 | ATGCGATTAATTG | ATGCGATTAATTG | GGTCAACAAATCATAAAGATATTGG | TAAACTTCAGGGTGACCAAAAAATCA |
| 79 | CCGTAGTGTTGAT | CCGTAGTGTTGAT | GGTCAACAAATCATAAAGATATTGG | TAAACTTCAGGGTGACCAAAAAATCA |
| 80 | CCTGTACCATTGT | CCTGTACCATTGT | GGTCAACAAATCATAAAGATATTGG | TAAACTTCAGGGTGACCAAAAAATCA |
| 81 | GGCTGTTACAACA | GGCTGTTACAACA | GGTCAACAAATCATAAAGATATTGG | TAAACTTCAGGGTGACCAAAAAATCA |
| 82 | GGTTCAATGACGC | GGTTCAATGACGC | GGTCAACAAATCATAAAGATATTGG | TAAACTTCAGGGTGACCAAAAAATCA |
| 83 | GGTTCCTGCACTT | GGTTCCTGCACTT | GGTCAACAAATCATAAAGATATTGG | TAAACTTCAGGGTGACCAAAAAATCA |
| 84 | GTCCAACCTCAGT | GTCCAACCTCAGT | GGTCAACAAATCATAAAGATATTGG | TAAACTTCAGGGTGACCAAAAAATCA |
| 85 | GTCCAGGCCTTCT | GTCCAGGCCTTCT | GGTCAACAAATCATAAAGATATTGG | TAAACTTCAGGGTGACCAAAAAATCA |
| 86 | GTGACGCCGTATT | GTGACGCCGTATT | GGTCAACAAATCATAAAGATATTGG | TAAACTTCAGGGTGACCAAAAAATCA |
| 87 | TGCAGCAACCAGC | TGCAGCAACCAGC | GGTCAACAAATCATAAAGATATTGG | TAAACTTCAGGGTGACCAAAAAATCA |
| 88 | TGGACATGGCATT | TGGACATGGCATT | GGTCAACAAATCATAAAGATATTGG | TAAACTTCAGGGTGACCAAAAAATCA |
