# Supplementary material for: DNA Barcoding for Species Identification of Moss-Dwelling Invertebrates: Performance of Nanopore Sequencing and Coverage in Reference Database
Source: MDPI journal article supplement (doi:10.3390/d16040196), 2024-03-25
Supplement: s1 [file s1]

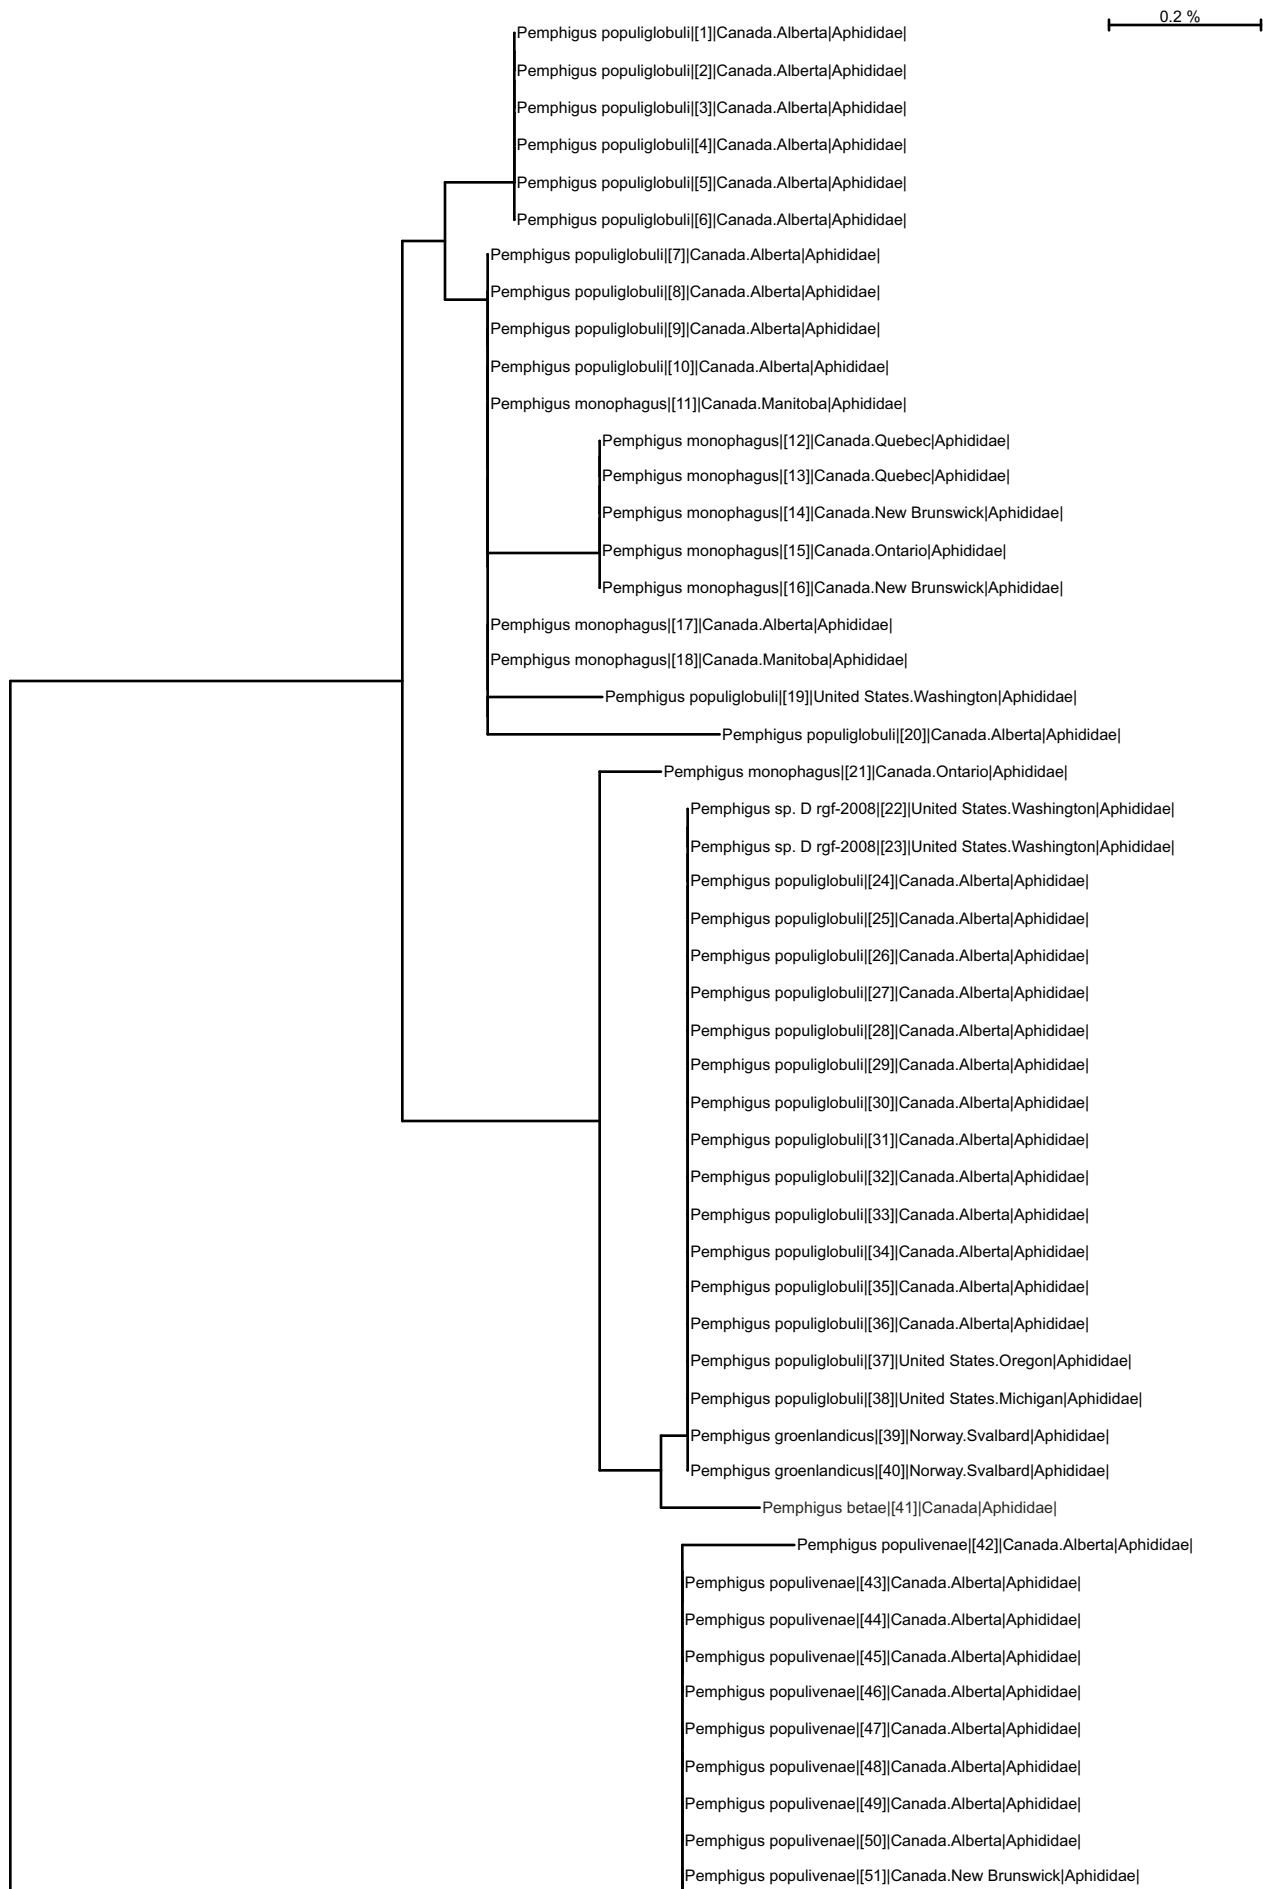

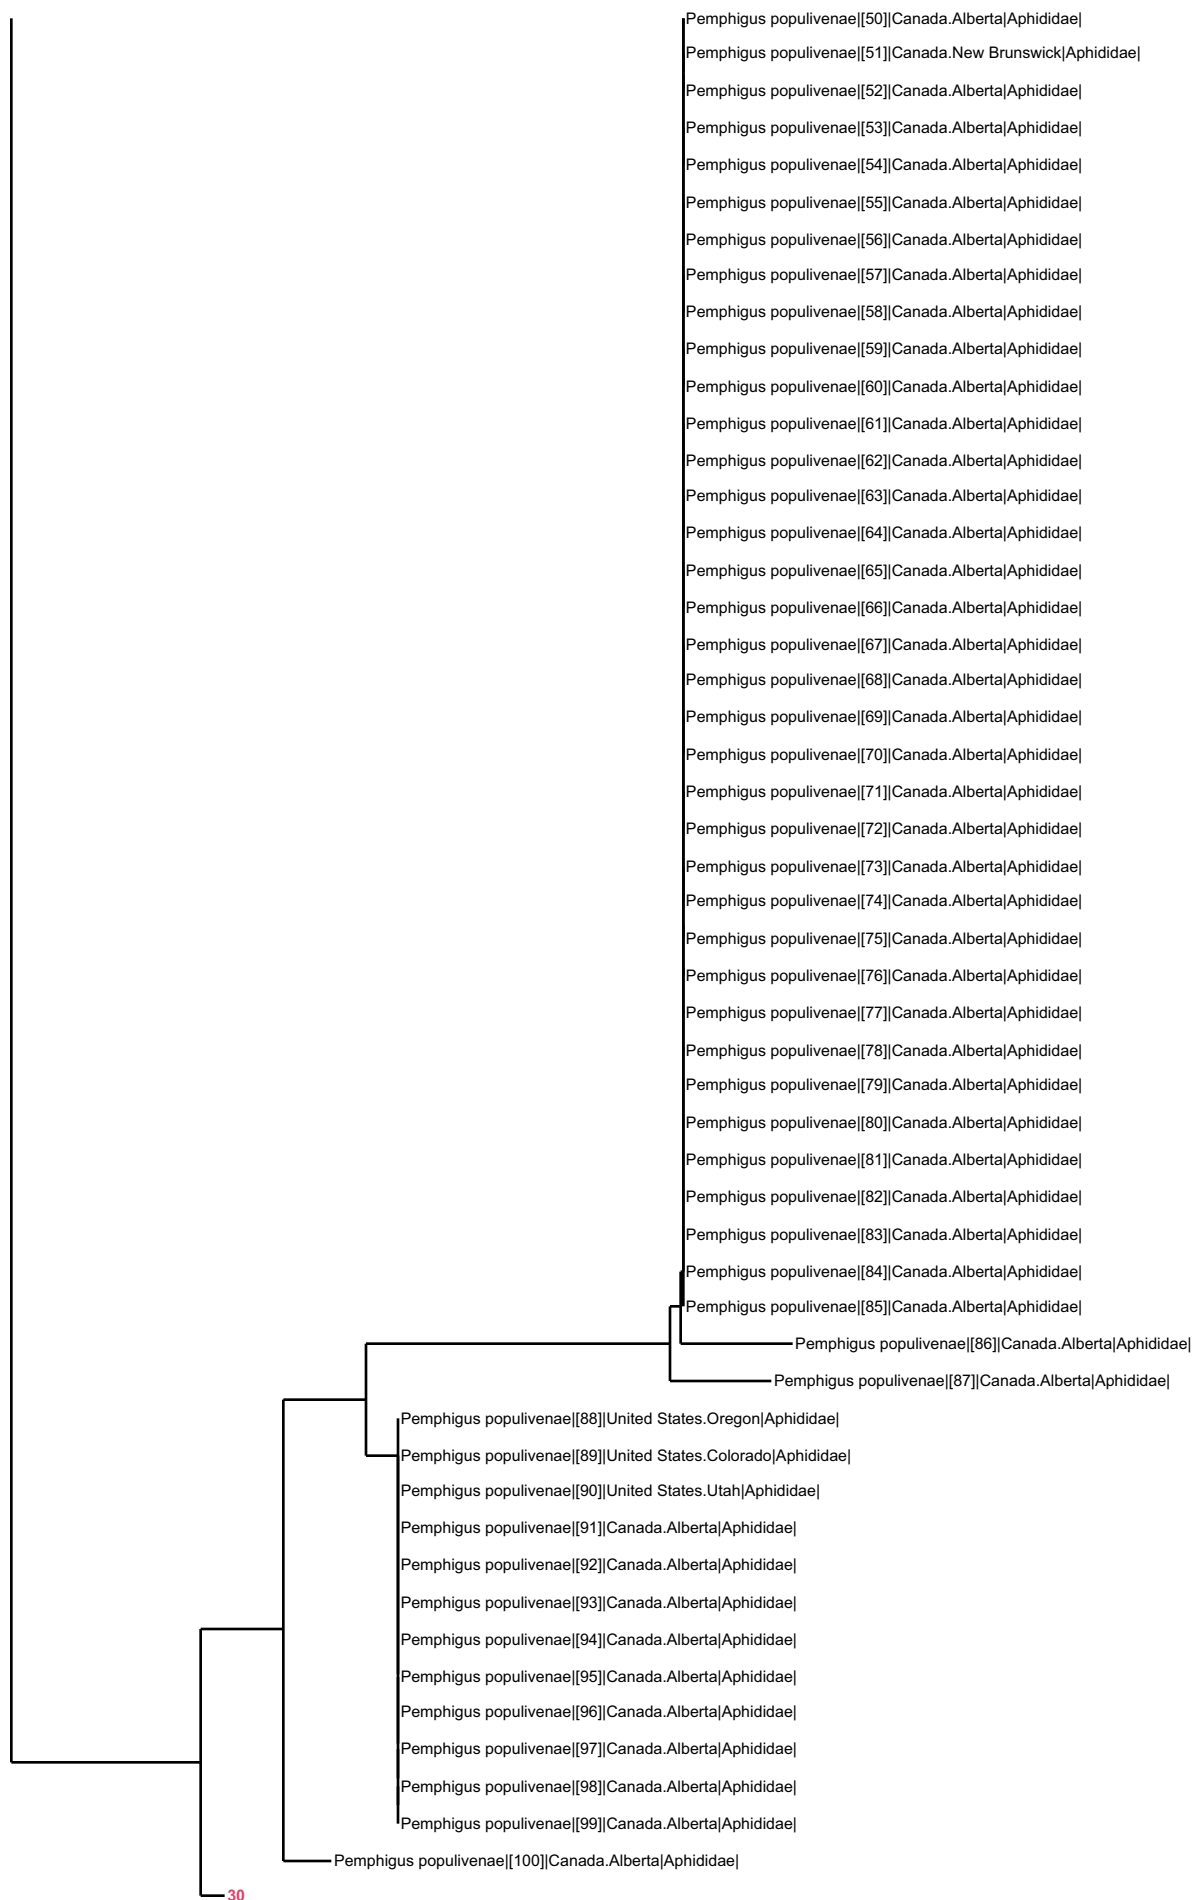

**Figure S5.** Assignment of sample 30 to *Pemphigus populivenae* using the tree-based assignment on BOLD.
